# Supplementary material
Source: PubMed Central journal article supplement (PMC5068331)
Supplement: pnas.1610115113.sapp.pdf [file pnas.1610115113.sapp.pdf]

## SI Appendix

**Title:**

**Integrated analysis of phenome, genome and transcriptome of hybrid rice uncovered multiple heterosis-related loci for yield increase**

Dayong Li, Zhiyuan Huang, Shuhui Song, Yeyun Xin, Donghai Mao, Qiming Lv, Ming Zhou, Dongmei Tian, Mingfeng Tang, Qi Wu, Xue Liu, Tingting Chen, Xianwei Song, Xiqin Fu, Bingran Zhao, Chengzhi Liang, Aihong Li, Guozhen Liu, Shigui Li, Songnian Hu, Xiaofeng Cao, Jun Yu, Longping Yuan, Caiyan Chen, Lihuang Zhu

## SI Materials and Methods

### Hybrid combinations and populations

The hybrid rice (*Oryza sativa* L.) cultivar Liang-you-pei 9 (LYP9), a two-line hybrid that was developed by crossing 93-11 with Peiai64S (PA64S), and its parental lines were used in this study. Another 13 commercial hybrid rice combinations, plus their parents (Fig. 2, SI Appendix, Dataset S1), were also studied to analyze heterotic performance with respect to yield-related traits. A population containing 219 recombinant inbred lines (RILs, F<sub>10</sub> generation) was developed by single seed descent from a cross between 93-11 and PA64S, and these 219 RILs were then backcrossed to the maternal parent PA64S to obtain 219 BC<sub>1</sub> lines (RILBC) (1). All materials are maintained at the China National Hybrid Rice R&D Center. Both RILs and RILBCs were used to map QTLs associated with heterosis for yield traits. In addition, a set of 361 hybrid combinations were collected from the market to genotype the *RH8* locus (SI Appendix, Dataset S5). Young inflorescences (<1 mm, 1-2 mm, 2-3 mm and 3-4 mm, 7-10 cm) were collected in the morning using a dissecting microscope and frozen in liquid nitrogen immediately after harvest. Leaves of six-week old seedlings were also collected and kept at -80°C for use.

### Plant growth and phenotyping

All plants were grown in randomized block designs with at least three biological replicates using standard agricultural management practices in Changsha (28 °12'N, 112 °58'E , long-day conditions) and in Sanya (18 °15'N, 109 °30'E, short-day conditions), China. A total of 300 plants in a 16 m<sup>2</sup> plot were characterized for each sample. Plant height (PH), heading date (HD), effective panicle number (EPN), spikelet per panicle (SPP), seed setting rate (SSR), kilo-grain weight (KGW), field yield (FY), and yield per pot (YPP) were surveyed in the field of Changsha, China, for four summers (2008, 2010, 2011, and 2014) for the RIL and RILBC populations

and for six summers (2010-2015) in Changsha and one winter (2011) in Sanya for LYP9 and its parents. The values for high-parent heterosis (HPH), mid-parent heterosis (MPH), and paternal parent heterosis (PPH) were calculated using the formulas “ $100*(F1-HP)/HP$ ”, “ $100*(F1-MP)/MP$ ”, and “ $100*(F1-PP)/PP$ ”, respectively. Significant phenotypic differences between genotypes were statistically analyzed using Student’s t test ( $P<0.05$ ).

### **Cluster analysis of heterosis performance**

In order to uncover heterosis traits that are shared by other combinations, the heterosis performance of 13 rice hybrids plus LYP9 were characterized for four summers (2011-2014) in Changsha, China (Fig. 2; [SI Appendix Dataset S1](#)). The averages of two to four years for each type of heterosis were used to perform cluster analysis with the Vegan package in R by Bray-Curtis distance based on the heterosis performance for yield-related traits (<http://cran.r-project.org/>, <http://vegan.r-forge.r-project.org/>). In the cluster tree, the percent heterosis for each component trait was classified by the depth of two colors, green and red, which represented negative and positive heterosis, respectively.

### **RNA isolation and mRNA-seq library construction**

Young inflorescences and leaves were ground to a fine powder in liquid nitrogen, and the total RNA was isolated using Trizol reagent (Invitrogen). We harvested the rice samples once in the morning (around 8:00-10:00 am) from the paddy field in Changsha, China. Total RNA from each sample was used to isolate poly (A) mRNA and to prepare a directional SOLiD RNA-Seq library according to the manufacturer’s protocol. Library quality control and quantification were performed with a Bioanalyzer Chip DNA 1000 series II (Agilent). cDNA in the range 150–200 bp was selected with Novex precast gel products (Invitrogen, Cat. no. NP0322BOX). The cDNA was amplified with 15 cycles of PCR and purified using the PureLink PCR Micro Kit (Invitrogen, Cat. no. K310250). The cDNA library was sequenced on an

AB SOLiD 4.0 sequencer according to the manufacturer's instructions (Thermofisher Scientific).

### **Read mapping and gene expression quantification**

The rice (*Oryza sativa* subsp. *japonica*) genome sequences and annotated gene structure information were downloaded from the Rice Genome Annotation Project website (<http://rice.plantbiology.msu.edu>, TIGR Version 6.1) (2). The exon-exon junction references were constructed as follows: first, we joined all possible pairs of non-redundant exons that belong to the same gene such that the genomic order of the exons was retained; then we constructed a junction sequence that consists of the last 49 bp of the 5' exon and the first 49 bp of the 3' exon, and the redundant sequences were removed from the resulting set of 98-bp exon junction sequences. All sequence reads were mapped to the rice genome and the in-house-built junction sequences using AB's SOLiD Corona\_lite\_v4.2 software available at <http://waprna.big.ac.cn> (3). We used a recursive strategy to improve the usable sequence read information, in which the 50-mer reads were first mapped to the genome and junction reference with a tolerance of 5 mismatches. The reads that failed to be mapped were progressively trimmed, removing five bases at one time from the 3' end. After this, the reads were mapped to the genome again until a match was found (unless the read had been trimmed by 25 bases) (4). All mapping was carried out in color-space, reads mapping to multiple genomic locations were discarded. All of the uniquely mapped reads were used for calculating the gene's RPKM values (reads per kilobase of exon per million mapped sequenced reads), which is used for defining gene expression level. The normalized gene expression value was used to calculate the Pearson correlation coefficient between any two replicated samples, and it was applied to assess the technological and biological replication (5). We calculated read coverage along the annotated transcript units based on the uniquely mapped reads. The length of each cDNA was divided into 100 equal segments (bins) for all annotated cDNAs, and the mean number of the read coverage for each segment of each individual cDNA was

calculated. The median values for each bin for all cDNAs were plotted against the segment number.

By calculating the read coverage for the annotated introns and exons in the rice genome of each sample, an empirical cutoff value (about 5% of genes contained  $>N$  reads per kb intron) was arbitrarily determined and used as a cutoff for detection of gene expression in each mRNA-Seq sample (6). Sequenced reads were randomly selected and the expressed gene number was calculated to evaluate the sequencing saturation.

### **Differentially expressed gene identification and classification**

We identified differentially expressed genes (DEGs) from different varieties and samples using an R package called DEGseq (7). For each gene, the P-value and Q-value were computed, and the significance threshold to control the false discovery rate at a given value was calculated. The fold changes were also estimated between the  $F_1$  hybrid and its parental lines (F, 93-11 and M, PA64S) based on the following formula:  $FC$  (Fold-Change) =  $F_1 / [(F+M)/2]$ . The DEGs were classified into five major expression patterns based on gene expression level and three different tests using DEGseq (7). Moreover, each gene was classified based on the expression level of the  $F_1$  hybrid versus both parental lines; tests 1 and 2 were used to estimate whether the expression level of the considered gene in the  $F_1$  hybrid significantly differs from that of the LP and/or the HP, whereas test 3 compares HP and LP. The five patterns are OHP (over-higher parents,  $F_1 > LP \geq HP$ , all the three tests are 'yes'), BLP (below-lower parents,  $F_1 < LP \leq HP$ , all the three tests are 'yes'), OMP (over mid-parents,  $LP < F_1 < HP$  or  $LP < F_1 = HP$ , tests 1 and 3 are 'yes'), BMP (below mid-parents,  $LP < F_1 < HP$  or  $LP = F_1 < HP$ , tests 2 and 3 are 'yes'), and MPV (similar to mid-parents). Non-additively expressed genes were identified by comparing their expression levels in the hybrid to the mid-parent value (MPV).

To associate cellular functions with the set of differentially expressed genes, we used an in-house-built pipeline to do KEGG pathway annotation (3), and Fisher's exact test was applied to test for enrichment of functional categories.

### **Genomic variation identification**

Genomic variations between 93-11 and PA64S were identified as follows: (1) the known variations were directly downloaded from the RGKbase database (<http://rgkbase.big.ac.cn/RGKbase/Ni.php>) (8); (2) the resequencing reads from 93-11 and PA64S were aligned to the TIGR ver6.1 genome sequence, and the sequence variations were called using GATK software (9); (3) eSNPs were called from transcriptome sequences using in-house-built methods for each sample. To be confident of the base calls, for each variety, we focused our analysis on high quality sites (average quality score  $\geq 15$ ) that were covered by at least four uniquely mapped reads and two non-redundant reads. A SNP locus was included for further analysis only if nearly homozygous (the major allele frequency  $> 0.85$ ). We quantified the allelic imbalance within a sample as the major allele frequency (MAF) of the gene. MAE, PAE, and BAE expression patterns were classified according to the expression levels of the two alleles; when only one allele was expressed, it was categorized as MAE, when the allele expression was biased to one parent by more than 2-fold, it was categorized as PAE, and when two alleles were expressed equally, it was categorized as BAE.

### **Genome Resequencing and QTL mapping**

The genomic DNAs of LYP9 RILs together with their parents (93-11 and PA64S) were isolated using the cetyl-trimethyl ammonium bromide (CTAB) method with minor modifications (10). Sequencing libraries were constructed from these samples and sequenced on the Illumina HiSeq2500 according to the manufacturer's instructions. The sequencing reads were aligned to the *indica* reference genome (93-11, <http://rice.genomics.org.cn>) using BWA software (11). Identification of

polymorphic sites including SNPs and InDels between the RILs and the parents was performed with GATK software (9). The co-segregating SNP and/or InDel markers were combined into Bins, which were then used to construct the genetic map of the RIL population using HighMap software (12). Briefly, based on the sequence variations between 93-11 and PA64s and the variant sequences among the RILs, 780,717 loci were randomly selected for genetic map construction. The loci that co-segregated with each other were anchored into the same block, called a Bin. A total of 2,972 Bins were used for construction of the final map with HighMap software (*SI Appendix, Fig. S7*). The RIL map consists of 12 linkage groups that correspond to the 12 rice chromosomes, each with 248 Bins on average. The 12 linkage groups range from 81.8 cM to 228.7 cM in length, with a total genetic distance of 1,573.1 cM and average neighboring Bin distance of 0.3 cM. The Spearman coefficient for each chromosome was at least 0.9975, very close to 1.0, indicating full collinearity between the genetic map and the rice genome.

The QTLs for each trait were detected by QTLMap6 software (<http://www.kyazma.nl/index.php/mc.MapQTL>). The LOD threshold was set to 2.5, and the 99% confidence interval for QTLs was determined by subtracting 2.0 LOD from the peak value, and the maximum interval length was not larger than 10 cM (13, 14). The mapped QTLs from the RIL populations were named *qSPPx* for spikelets (the x indicates the chromosome number), *qPHx* for plant height, *qHDx* for heading date, *qEPx* for effective panicle number, *qSSRx* for seed setting rate, and *qKGWx* for grain weight. Correspondently, the QTLs detected in the RILBCs were thus named *qhSPPx* for spikelets (h is the abbreviation of heterosis, and x indicates the chromosome number), *qhPHx* for PH, *qhHDx* for HD, *qhEPx* for EPN, *qhSSRx* for SSR, and *qhKGWx* for GW. Through conjoint analysis of QTLs detected in both the RI and the BC populations, the additive effects (ADD), the dominance effects (DOM), and the degree of dominance (DOM/ADD) of each heterosis QTL were calculated. The loci with absolute values of DOM/ADD <0.2 were considered to have no significant dominance, 0.2-0.8 showed partial dominance, 0.8-1.2 showed complete

dominance, and 1.2 or more showed over-dominance (15). For the loci detected only in the RILBC1 population, the performance of the related heterozygosis genotype should differ significantly from its parents. When the effect was similar to over-dominance (the value of DOM was larger than that of ADD) but without additive effects, it was then regarded as “Superdominance” in this paper. Although the degree of dominance of QTLs detected only in the RIL population can also be estimated, it is omitted for further analyses due to the absence of phenotypic value of heterozygote. For a single heterozygous locus, the contribution to heterosis, higher parent heterosis (HPH), middle parent heterosis (MPH) or low parents heterosis (LPH) could be determined statistically by comparing the performance of the heterozygote with the higher parent value (HPV), the middle parent value (MPV), and the lower parent value (LPV).

#### **Genotyping analysis of *RH8* and *Ghd7***

The coding regions of *RH8/DHT8/Ghd8/LHD1* (LOC\_Os08g07740) and *Ghd7* (LOC\_Os07g15770) in the parental lines of the 14 phenotyped hybrid combinations were amplified from genomic DNA using Trans Start Fast Pfu DNA polymerase (TransGen Biotech) for sequencing. Sequence contigs were assembled with the program SEQUENCHER 4.1.2. InDel and CAPS markers based on the *RH8* truncated allele haplotype (ZS97A/TFA/FYA/J23A/V20A) and the +322bp SNP allele haplotype (MH63/R527/MY46/JY207/FH838), were designed to identify these types in hybrid populations. An InDel Marker was applied to genotyping *Ghd7* in hybrid populations, of which *Ghd7* loci such as in ‘Zhenshan97’ were completely deleted and no PCR products were amplified. [Table S6 \(SI Appendix\)](#) provides a list of all primers used for polymerase chain reaction (PCR) amplification and DNA sequencing.



## SI References

1. Xin Y & Yuan L (2014) Heterosis loci and QTL of Super Hybrid Rice Liangyoupeijiu Yield by Using Molecular Marker. *Scientia Agricultura Sinica* 47:2699-2714.
2. Kawahara Y, *et al.* (2013) Improvement of the *Oryza sativa* Nipponbare reference genome using next generation sequence and optical map data. *Rice* 6.
3. Zhao WM, *et al.* (2011) wapRNA: a web-based application for the processing of RNA sequences. *Bioinformatics* 27(21):3076-3077.
4. Cloonan N, *et al.* (2008) Stem cell transcriptome profiling via massive-scale mRNA sequencing. *Nat Methods* 5(7):613-619.
5. Marioni JC, Mason CE, Mane SM, Stephens M, & Gilad Y (2008) RNA-seq: An assessment of technical reproducibility and comparison with gene expression arrays. *Genome Res* 18(9):1509-1517.
6. He GM, *et al.* (2010) Global Epigenetic and Transcriptional Trends among Two Rice Subspecies and Their Reciprocal Hybrids. *Plant Cell* 22(1):17-33.
7. Wang LK, Feng ZX, Wang X, Wang XW, & Zhang XG (2010) DEGseq: an R package for identifying differentially expressed genes from RNA-seq data. *Bioinformatics* 26(1):136-138.
8. Wang DP, Xia Y, Li XN, Hou LX, & Yu J (2013) The Rice Genome Knowledgebase (RGKbase): an annotation database for rice comparative genomics and evolutionary biology. *Nucleic Acids Res* 41(D1):D1199-D1205.
9. McKenna A, *et al.* (2010) The Genome Analysis Toolkit: A MapReduce framework for analyzing next-generation DNA sequencing data. *Genome Res* 20(9):1297-1303.
10. Murray MG & Thompson WF (1980) Rapid Isolation of High Molecular-Weight Plant DNA. *Nucleic Acids Res* 8(19):4321-4325.
11. Li H & Durbin R (2009) Fast and accurate short read alignment with Burrows-Wheeler transform. *Bioinformatics* 25(14):1754-1760.

12. Liu DY, *et al.* (2014) Construction and Analysis of High-Density Linkage Map Using High-Throughput Sequencing Data. *PLoS One* 9(6).
13. van Ooijen JW BM, Jansen RC, Maliepaard C (2002) *MapQTL 4.0, software for the calculation of QTL positions on genetic maps* (Plant Research International, Wageningen).
14. Wang J, *et al.* (2010) A global analysis of QTLs for expression variations in rice shoots at the early seedling stage. *Plant J* 63(6):1063-1074.
15. Stuber CW, Edwards MD, & Wendel JF (1987) Molecular Marker-Facilitated Investigations of Quantitative Trait Loci in Maize .2. Factors Influencing Yield and Its Component Traits. *Crop Sci* 27(4):639-648.

## SI Figures

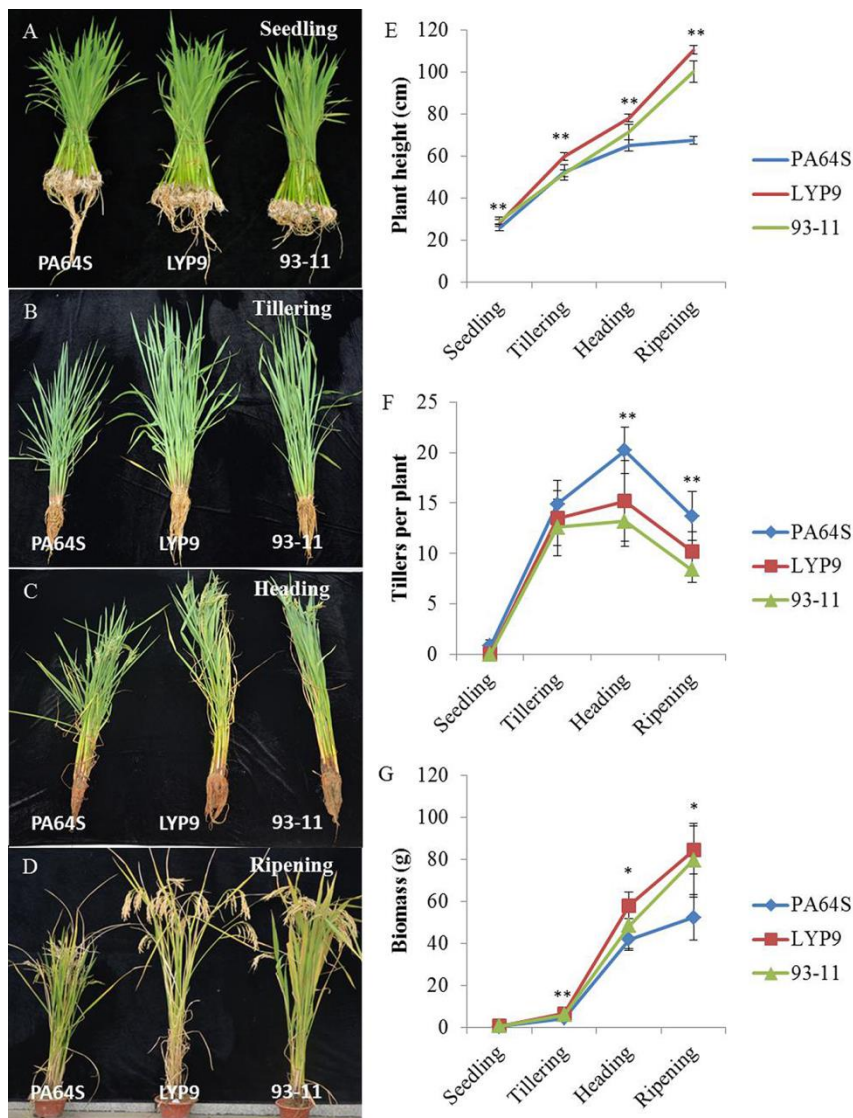

**Fig. S1 Vegetative growth of LYP9 and its parents at the 20 day-old-seedling, tillering, heading, and maturity stages.**

(A), 20-day old seedling; (B) tillering stage; (C), heading stage, (D) maturity stage; (E-G), comparisons of tiller number (E), plant height (F), and biomass (G) at four developmental stages. ‘\*’ and ‘\*\*’ represent significant differences (5% or 1%, respectively) between LYP9 and the higher parent.

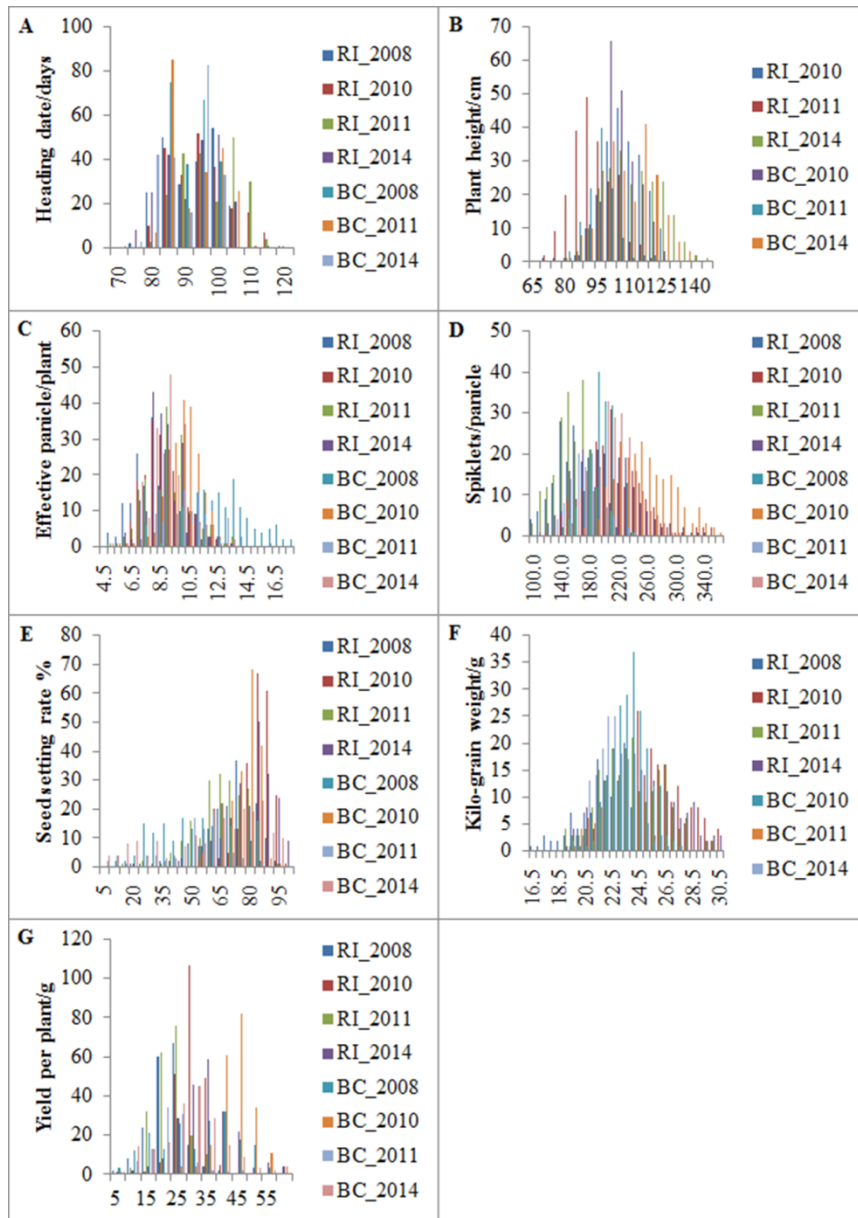

**Fig.S2 The frequency of yield-related traits of RILs population and its PA64S-backcrossed population in four years.**

(A) Heading date; (B) Plant height; (C) Effective panicles per plant; (D) Spiklets per panicle; (E) Seed setting rate; (F) Kilo-grain weight; (G) Yield per plant.

RI: recombinant inbred line (RIL) population; and BC: backcross population, the F1 population of backcrossing to PA64S.

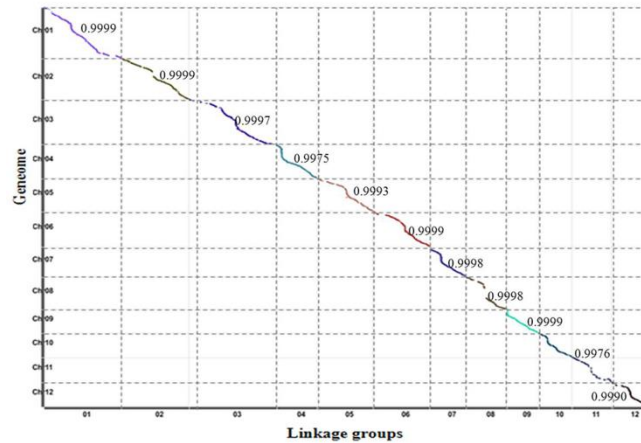

**Fig. S3 Collinearity between the Bin map derived from the LYP9 RIL population and the reference genome (cv. Nipponbare)**

The horizontal and the vertical axes represent the genetic positions of the 12 linkage groups from the LYP9 RIL population map and the physical positions of the 12 rice chromosomes, respectively. The scattered points represent the Bin markers used in QTL mapping. The data for each chromosome and linkage group pair is the value of Spearman correlation coefficient, which indicates good collinearity when it is close to 1.

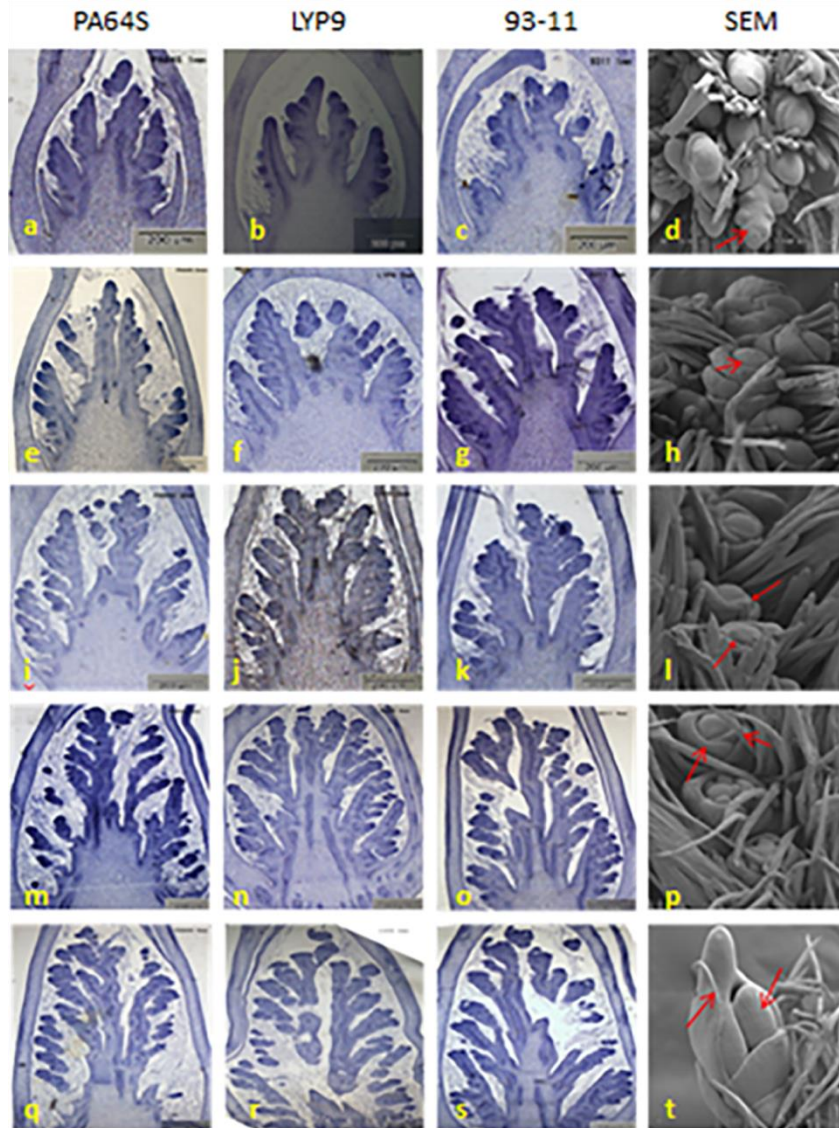

**Fig. S4 Comparative microanatomy of the development of the young inflorescence in LYP9 and its parental lines, PA64S and 93-11.**

**(a-d)** Histological examination of the rice inflorescence at <1 mm. The panicle at this stage is of key importance for primary branch formation, but the secondary branch number has not yet been determined. **(e-h)** The panicle at 1-2 mm in length. The uppermost primary branch has elongated, and the secondary branch primordia have initiated. Thus, at this stage, the number of primary branches has been determined. Organ primordia of the terminal flower have emerged; however, no stamen primordia were observed. Tertiary branch primordia were not observed in the lowest secondary branches. **(i-l)** The panicle at 2-3 mm in length. The secondary branch number has

been determined. Tertiary branch primordia (or spikelet primordia) have formed in the lowest secondary branches, and stamen primordia formation has initiated. The number of secondary branches has been determined by this stage. **(m-p)** The panicle at 3-4 mm in length. The palea and lemma in the terminal flower of the uppermost primary branch are obviously elongated but are not closed. Thus, the number of spikelets has been determined by this stage. **(q-t)** The panicle at 4-5 mm in length. The stamen primordia are clearly observed and the lemma and palea are closed. No more spikelets have formed at this stage.



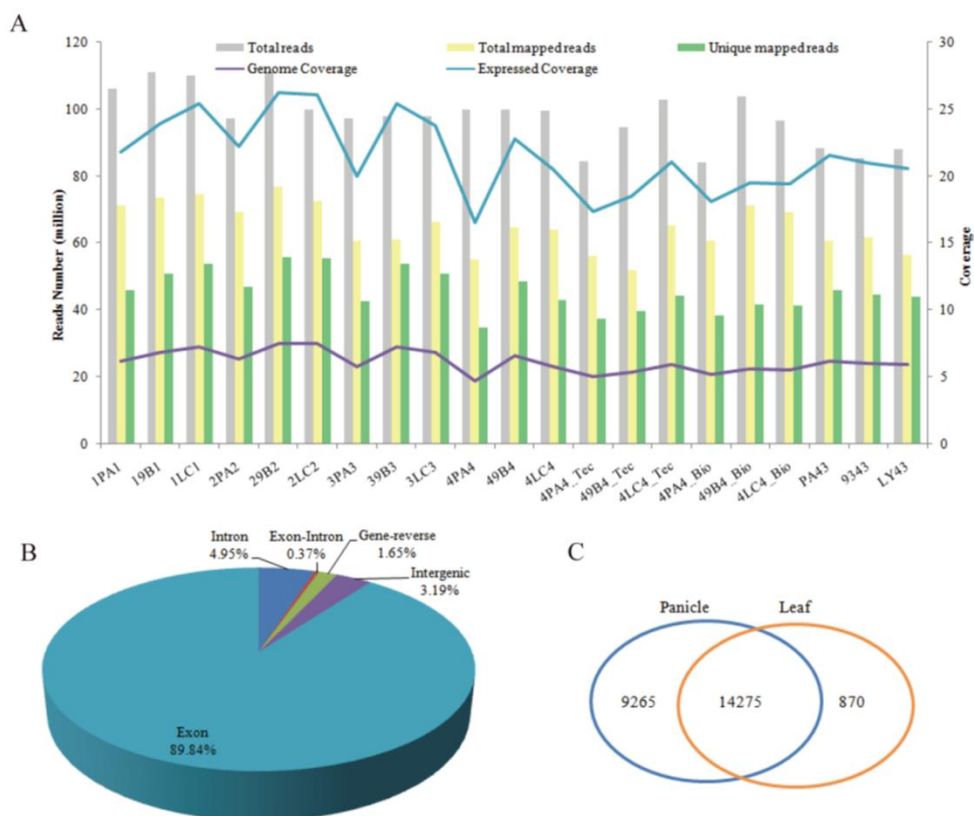

**Fig. S5 Comparative RNA-seq analysis of the super-hybrid rice LYP9 and its parental lines 93-11 and PA64S.**

(A) Number of sequence reads, total mapped reads, uniquely mapped reads, and genome coverage and expressed transcript coverage for each sequenced sample. (B) Genomic distribution of sequence reads among annotated rice genomic features. (C) Venn diagram showing the overlap of expressed genes between panicle and leaf.



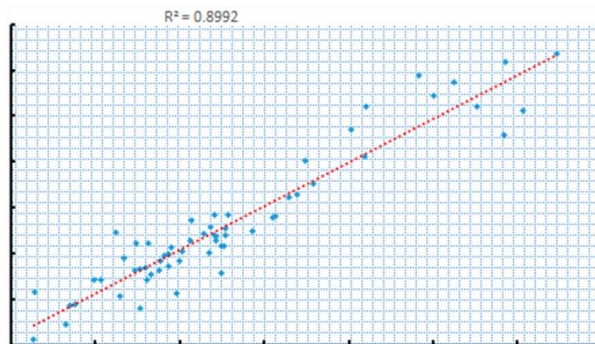

**Fig. S6 Validating the RNA-seq data using qRT-PCR.**

qRT-PCR validation was performed by comparing the log<sub>2</sub> ratio of RPKM by RNA-seq and the log<sub>2</sub> ratio of relative expression of 30 genes calculated by qRT-PCR. The Pearson Correlation Coefficient was calculated.

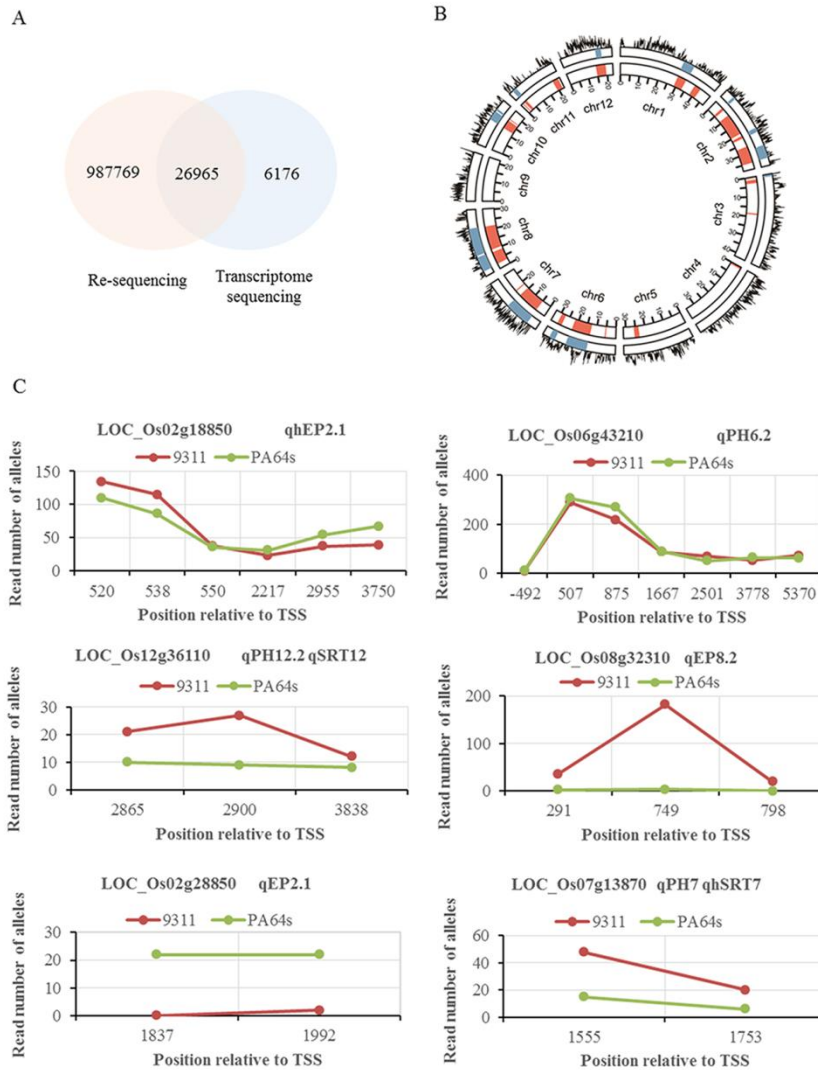

**Fig. S7. Genomic variation between the two parental genomes 93-11 and PA64S.**

(A) Venn diagram of identified single nucleotide variation by re-sequencing and transcriptome sequencing. (B) Density distribution of identified SNPs along whole genome plotted by 50kb sliding window and 10kb step length. (C) Example of allelic expression pattern in F1 hybrid.

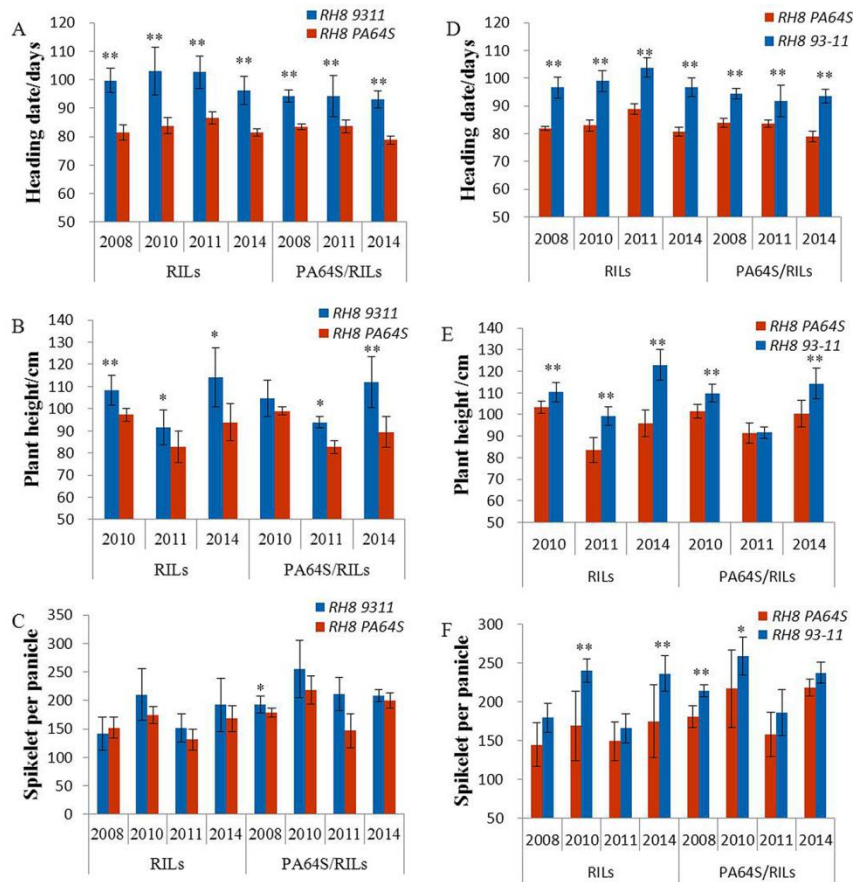

**Fig. S8 Heterosis of *RH8* for heading date, plant height, and spikelets per panicle in the lines with genomes closing to PA64S or 93-11 (>65%).**

(A-C) Comparison of the 93-11 and PA64S alleles of *RH8* in the RILs with genomes close to PA64S (>65%) in the RIL and BC populations for the traits heading date (A), plant height (B), and spikelet number per panicle (C); (D-F) Comparison of the 93-11 and PA64S alleles of *RH8* in the RILs with genomes close to 93-11 (>65%) in the RIL and BC populations for heading date (D), plant height (E), and spikelet number per panicle (F). ‘\*’ and ‘\*\*’ represent significant differences at  $P < 0.05$  or  $0.01$ , respectively, as determined by Student’s *t* test.

## SI Tables

**Table S1.** Statistics of differentially expressed genes (DEGs) for each developmental period.

**Table S2.** Classification of differentially expressed genes (DEGs) between the F<sub>1</sub> hybrids and their parental lines for each developmental stage based on gene expression levels.

**Table S3.** Seventeen genes that overlapped with the QTL peak signals.

**Table S4.** Allelic combinations of *RH8* in a set of 361 commercial rice hybrids

**Table S5** Genotypes of *Ghd7* in 14 hybrid combinations

**Table S6.** List of oligonucleotide primers used for PCR amplification and DNA sequencing.

**Table S1. Statistics of differentially expressed genes (DEGs) in each developmental period**

|                       | <b>P1</b> | <b>P2</b>   | <b>P3</b> | <b>P4</b> | <b>Leaf</b> |
|-----------------------|-----------|-------------|-----------|-----------|-------------|
| Total ExpGene #       | 16633     | 16382       | 16252     | 16919     | 15145       |
| Total DEG (P<0.001)   | 10558     | 11566       | 11648     | 11205     | 10821       |
| Total DEG %           | 63.48%    | 70.60%      | 71.67%    | 66.23%    | 71.45%      |
| Common DEGs           |           | <b>6133</b> |           |           | 10821       |
| <i>93-11 vs PA64s</i> | 8667      | 9280        | 8146      | 9385      | 8200        |
| <i>93-11 vs LYP9</i>  | 5588      | 6738        | 7804      | 5895      | 6192        |
| <i>PA64s vs LYP9</i>  | 6664      | 7438        | 7734      | 7336      | 7659        |
| F1>MPV <sup>a</sup> # | 4872      | 6039        | 5089      | 5219      | 6151        |
| F1>MPV & F1>HP #      | 1880      | 2731        | 2973      | 1941      | 3609        |
| F1<MPV #              | 5653      | 5499        | 6536      | 5954      | 4640        |
| F1<MPV # & F1<LP      | 1883      | 1863        | 3806      | 2029      | 1919        |
| F1=MPV #              | 33        | 28          | 22        | 32        | 30          |
| F1>MPV (Ratio>2) #    | 31        | 21          | 14        | 19        | 117         |
| F1<MPV (Ratio<0.5) #  | 65        | 71          | 203       | 73        | 161         |
| TE-related DEG #      | 242       | 260         | 253       | 252       | 204         |
| TF DEG #              | 739       | 791         | 773       | 762       | 646         |
| TF DEG %              | 7.0%      | 6.8%        | 6.6%      | 6.8%      | 6.0%        |
| TF Gene (F1>MPV)#     | 315       | 445         | 302       | 398       | 371         |
| Common TF DEGs #      |           | <b>454</b>  |           |           | 646         |

Note: <sup>a</sup> MPV(mid-parent value) = (Fa+Mo)/2

P1: panicles of lengths of 0-1 mm; P2: panicles of lengths of 1-2 mm ; P3: panicles of lengths of 2-3 mm ; P4: panicles of lengths of 3-4 mm.

**Table S2** Classification of differentially expressed genes (DEGs) between F1 hybrid to their parental lines in each developmental period stage according to gene expression levels

| Pattern <sup>a</sup> | Expression Pattern <sup>b</sup> | Criteria |       |       | Total number of genes |       |       |       |       | Number of nonadditive genes <sup>c</sup> |       |       |       |       |
|----------------------|---------------------------------|----------|-------|-------|-----------------------|-------|-------|-------|-------|------------------------------------------|-------|-------|-------|-------|
|                      |                                 | LP≠F1    | HP≠F1 | HP≠LP | P1                    | P2    | P3    | P4_B  | Leaf  | P1                                       | P2    | P3    | P4_B  | Leaf  |
| OHP                  | F1>HP(F)>LP(M)                  | Y        | Y     | Y     | 99                    | 152   | 345   | 160   | 392   | 99                                       | 152   | 345   | 160   | 392   |
|                      | F1>HP(F)=LP(M)                  | Y        | Y     | N     | 349                   | 587   | 907   | 282   | 948   | 349                                      | 587   | 907   | 282   | 948   |
|                      | F1>HP(M)>LP(F)                  | Y        | Y     | Y     | 78                    | 138   | 248   | 80    | 186   | 78                                       | 138   | 248   | 80    | 186   |
|                      | Sum                             |          |       |       | 526                   | 877   | 1500  | 522   | 1526  | 526                                      | 877   | 1500  | 522   | 1526  |
|                      | (Sum/Total) %                   |          |       |       | 5.0%                  | 7.6%  | 12.9% | 4.7%  | 14.1% | 16.3%                                    | 20.0% | 23.9% | 14.3% | 29.1% |
| BLP                  | F1<LP(F)<HP(M)                  | Y        | Y     | Y     | 107                   | 140   | 392   | 131   | 300   | 107                                      | 140   | 392   | 131   | 300   |
|                      | F1<LP(F)=HP(M)                  | Y        | Y     | N     | 253                   | 307   | 1044  | 343   | 344   | 253                                      | 307   | 1044  | 343   | 344   |
|                      | F1<LP(M)<HP(F)                  | Y        | Y     | Y     | 44                    | 89    | 384   | 101   | 124   | 44                                       | 89    | 384   | 101   | 124   |
|                      | Sum                             |          |       |       | 404                   | 536   | 1820  | 575   | 768   | 404                                      | 536   | 1820  | 575   | 768   |
|                      | (Sum/Total) %                   |          |       |       | 3.8%                  | 4.6%  | 15.6% | 5.1%  | 7.1%  | 12.5%                                    | 12.2% | 29.0% | 15.8% | 14.6% |
| OMP                  | LP<F1<HP                        | Y        | Y     | Y     | 873                   | 1068  | 620   | 1010  | 743   | 139                                      | 249   | 163   | 152   | 173   |
|                      | LP<F1=HP                        | Y        | N     | Y     | 2308                  | 2724  | 1941  | 2531  | 2541  | 655                                      | 978   | 758   | 835   | 1043  |
|                      | Sum                             |          |       |       | 3181                  | 3792  | 2561  | 3541  | 3284  | 794                                      | 1227  | 921   | 987   | 1216  |
|                      | (Sum/Total) %                   |          |       |       | 30.1%                 | 32.8% | 22.0% | 31.6% | 30.3% | 24.6%                                    | 27.9% | 14.7% | 27.1% | 23.2% |
|                      | LP<F1<HP                        | Y        | Y     | Y     | 1426                  | 1506  | 1053  | 1465  | 1128  | 285                                      | 348   | 276   | 330   | 370   |
| BMP                  | LP=F1<HP                        | N        | Y     | Y     | 2423                  | 2322  | 2319  | 2564  | 1880  | 815                                      | 931   | 1105  | 841   | 892   |
|                      | Sum                             |          |       |       | 3849                  | 3828  | 3372  | 4029  | 3008  | 1100                                     | 1279  | 1381  | 1171  | 1262  |
|                      | (Sum/Total) %                   |          |       |       | 36.5%                 | 33.1% | 28.9% | 36.0% | 27.8% | 34.1%                                    | 29.1% | 22.0% | 32.1% | 24.0% |
| ~MPV                 | Ambiguous                       | vary     | vary  | vary  | 2598                  | 2533  | 2395  | 2538  | 2235  | 400                                      | 476   | 644   | 392   | 476   |
|                      | (Sum/Total) %                   |          |       |       | 24.6%                 | 21.9% | 20.6% | 22.7% | 20.7% | 12.4%                                    | 10.8% | 10.3% | 10.7% | 9.1%  |
|                      | Total                           |          |       |       | 10558                 | 11566 | 11648 | 11205 | 10821 | 3224                                     | 4395  | 6266  | 3647  | 5248  |

Note:<sup>a</sup> DEGs were classified into four major patterns based on gene expression level and three different tests, OHP (over-higher parents), BLP (below-lower parents), OMP (over mid-parents), BMP (below mid-parents). <sup>b</sup>Higher parent (HP), lower parent (LP). <sup>c</sup> non-additive genes were determined by comparing F1 hybrid expression levels to the mid-parent value (MPV)

**Table S3** Seventeen genes that overlapped with the QTL peak signals

| #QTL             | Year | Chr | QTL_Estart | QTL<br>End | Peak<br>Start | Peak<br>End | TIGR_ID                                                                                                                                                                                                                                                                        |
|------------------|------|-----|------------|------------|---------------|-------------|--------------------------------------------------------------------------------------------------------------------------------------------------------------------------------------------------------------------------------------------------------------------------------|
| <i>qhEP2.2</i>   | 2010 | 2   | 20613225   | 22499562   | 21755525      | 21762095    | LOC_Os02g33680,LOC_Os02g51760,LOC_Os02g51780                                                                                                                                                                                                                                   |
| <i>qhEP8.2</i>   | 2010 | 8   | 9754078    | 21997809   | 19921005      | 20043742    | LOC_Os08g30480                                                                                                                                                                                                                                                                 |
| <i>qhKGW10.1</i> | 2010 | 10  | 12128159   | 15282602   | 14181169      | 14207577    | LOC_Os10g30280                                                                                                                                                                                                                                                                 |
| <i>qhKGW10.2</i> | 2010 | 10  | 16794050   | 17672567   | 17147467      | 17215965    | LOC_Os10g34350,LOC_Os10g34380,LOC_Os10g34370,LOC_Os10g34390                                                                                                                                                                                                                    |
| <i>qhKGW11.2</i> | 2011 | 11  | 1846187    | 3781250    | 2746754       | 2751892     | LOC_Os11g06070                                                                                                                                                                                                                                                                 |
| <i>qhPH12.22</i> | 2014 | 12  | 17596664   | 18220616   | 17657805      | 17810221    | LOC_Os12g36170,LOC_Os12g36180,LOC_Os12g36194,LOC_Os12g36210                                                                                                                                                                                                                    |
| <i>qhPH6.1</i>   | 2010 | 6   | 12804716   | 22214277   | 20900333      | 20920306    | LOC_Os06g34660                                                                                                                                                                                                                                                                 |
| <i>qhPH6.2</i>   | 2014 | 6   | 27781841   | 28314807   | 28051291      | 28111018    | LOC_Os06g44050                                                                                                                                                                                                                                                                 |
| <i>qhSPP1</i>    | 2008 | 1   | 28596855   | 33584095   | 30229665      | 30642682    | LOC_Os01g47350,LOC_Os01g47360,LOC_Os01g47450,LOC_Os01g47560<br>LOC_Os01g47600,LOC_Os01g47620,LOC_Os01g47650,LOC_Os01g47660,<br>LOC_Os01g47680,LOC_Os01g47710,LOC_Os01g47730,LOC_Os01g47760                                                                                     |
| <i>qhSPP2.1</i>  | 2014 | 2   | 4090670    | 5284201    | 4669122       | 4710089     | LOC_Os02g07690,LOC_Os02g07700                                                                                                                                                                                                                                                  |
| <i>qhSPP2.2</i>  | 2014 | 2   | 28795776   | 34712318   | 33718984      | 33764990    | LOC_Os02g51790                                                                                                                                                                                                                                                                 |
| <i>qhSRT12</i>   | 2014 | 12  | 16952661   | 18139431   | 17248402      | 17328731    | LOC_Os12g35620,LOC_Os12g35640,LOC_Os12g35670                                                                                                                                                                                                                                   |
| <i>qSRT3</i>     | 2014 | 3   | 215235     | 1089464    | 250176        | 666664      | LOC_Os03g01008,LOC_Os03g01014,LOC_Os03g01090,LOC_Os03g01100,<br>LOC_Os03g01120,LOC_Os03g01160,LOC_Os03g01170,LOC_Os03g01180,<br>LOC_Os03g01190,LOC_Os03g01200,LOC_Os03g01216,LOC_Os03g01240,<br>LOC_Os03g01300,LOC_Os03g01530,LOC_Os03g01550,LOC_Os03g01600,<br>LOC_Os03g01670 |
| <i>qSRT7</i>     | 2014 | 7   | 4850103    | 14586562   | 6956507       | 6978106     | LOC_Os07g12250                                                                                                                                                                                                                                                                 |
| <i>qSRT8</i>     | 2014 | 8   | 4015325    | 6161423    | 4846573       | 4898619     | LOC_Os08g08000                                                                                                                                                                                                                                                                 |

**Table S4.** Allelic combinations of RH8 in a set of 361 commercial rice hybrids

| Hybrid type | Cultivar No. | Cultivar name       | ~1kb deletion: 0; no ~1kb deletion:1 | 1bp deletion:0; hybrid: H, no 1 bp deletion: 1 | both non-functional: 0; hybrid: H (two conditions: 0 and 1, 1 and H) ; both functional: 1 |
|-------------|--------------|---------------------|--------------------------------------|------------------------------------------------|-------------------------------------------------------------------------------------------|
| 2-line      | 14CSH18      | Cliangyou 1102      | 1                                    | 0                                              | 0                                                                                         |
| 2-line      | 14CSH319     | Cliangyou 34156     | 1                                    | 0                                              | 0                                                                                         |
| 2-line      | 14CSH369     | Cliangyou 386       | 1                                    | 0                                              | 0                                                                                         |
| 2-line      | 14CSH286     | Cliangyou 396       | 1                                    | 0                                              | 0                                                                                         |
| 2-line      | 14CSH372     | Cliangyou 4418      | 0                                    | 0                                              | 0                                                                                         |
| 2-line      | 14CSH324     | Cliangyou 513       | 1                                    | 0                                              | 0                                                                                         |
| 2-line      | 14CSH403     | Cliangyou 755       | 1                                    | 0                                              | 0                                                                                         |
| 2-line      | 14CSH316     | Cliangyouhongmi R01 | 1                                    | 0                                              | 0                                                                                         |
| 2-line      | 14CSH425     | Yliangyou 2010      | 0                                    | 0                                              | 0                                                                                         |
| 2-line      | 14CSH414     | Yliangyou 2108      | 1                                    | 0                                              | 0                                                                                         |
| 2-line      | 14CSH391     | Yliangyou 488       | 1                                    | 0                                              | 0                                                                                         |
| 2-line      | 14CSH416     | Yliangyou 51        | 1                                    | 0                                              | 0                                                                                         |
| 2-line      | 14CSH402     | Yliangyou 527       | 1                                    | 0                                              | 0                                                                                         |
| 2-line      | 14CSH126     | Yliangyou 5845      | ?                                    | 0                                              | 0                                                                                         |
| 2-line      | 14CSH386     | Yliangyou 696       | 1                                    | 0                                              | 0                                                                                         |
| 2-line      | 14CSH98      | Yliangyou 8188      | 0                                    | 0                                              | 0                                                                                         |
| 2-line      | 14CSH235     | Yliangyou 9918      | 1                                    | 0                                              | 0                                                                                         |
| 2-line      | 14CSH394     | Aoliangyou 200      | 0                                    | 0                                              | 0                                                                                         |
| 2-line      | 14CSH400     | Aoliangyou 28       | 0                                    | 0                                              | 0                                                                                         |
| 2-line      | 14CSH389     | Aoliangyou 69       | 0                                    | 0                                              | 0                                                                                         |
| 2-line      | 14CSH395     | Aoliangyou 76       | 0                                    | 0                                              | 0                                                                                         |
| 2-line      | 14CSH399     | Aolongyou 282       | 0                                    | 0                                              | 0                                                                                         |
| 2-line      | 14CSH113     | Aoyou 83            | 0                                    | 0                                              | 0                                                                                         |
| 2-line      | 14CSH396     | Baliangyou 18       | 0                                    | 0                                              | 0                                                                                         |
| 2-line      | 14CSH220     | Fengliangyou 6#     | 1                                    | 0                                              | 0                                                                                         |
| 2-line      | 14CSH89      | Huayou 230          | 1                                    | 0                                              | 0                                                                                         |
| 2-line      | 14CSH100     | Liangyou 1259       | 1                                    | 0                                              | 0                                                                                         |
| 2-line      | 14CSH77      | Liangyou 15         | 1                                    | 0                                              | 0                                                                                         |
| 2-line      | 14CSH93      | Liangyou 1586       | 1                                    | 0                                              | 0                                                                                         |
| 2-line      | 14CSH112     | Liangyou 2111       | 1                                    | 0                                              | 0                                                                                         |
| 2-line      | 14CSH96      | Liangyou 2161       | 1                                    | 0                                              | 0                                                                                         |
| 2-line      | 14CSH116     | Liangyou 2186       | 1                                    | 0                                              | 0                                                                                         |
| 2-line      | 14CSH259     | Liangyou 266        | 1                                    | 0                                              | 0                                                                                         |



|        |          |                    |   |   |   |
|--------|----------|--------------------|---|---|---|
| 2-line | 14CSH32  | Liangyouhang 2#    | 1 | 0 | 0 |
| 2-line | 14CSH162 | Longliangyou 340   | 1 | 0 | 0 |
| 2-line | 14CSH73  | Longping 602       | 1 | 0 | 0 |
| 2-line | 14CSH313 | Luliangyou 4026    | 0 | 0 | 0 |
| 2-line | 14CSH46  | Luliangyou 98      | 1 | 0 | 0 |
| 2-line | 14CSH301 | Luliangyou 996     | 0 | 0 | 0 |
| 2-line | 14CSH114 | Mingliangyou 527   | 1 | 0 | 0 |
| 2-line | 14CSH330 | Tanliangyou 215    | 1 | 0 | 0 |
| 2-line | 14CSH404 | Changliangyou 173  | 1 | 0 | 0 |
| 2-line | 14CSH241 | Zhuliangyou 06     | 1 | 0 | 0 |
| 2-line | 14CSH72  | Zhuliangyou 08     | 1 | 0 | 0 |
| 2-line | 14CSH410 | Zhuliangyou 10     | 1 | 0 | 0 |
| 2-line | 14CSH413 | Zhuliangyou 120    | 1 | 0 | 0 |
| 2-line | 14CSH388 | Zhuliangyou 173    | 1 | 0 | 0 |
| 2-line | 14CSH336 | Zhuliangyou 189    | 1 | 0 | 0 |
| 2-line | 14CSH45  | Zhuliangyou 1#     | 1 | 0 | 0 |
| 2-line | 14CSH306 | Zhuliangyou 211    | 1 | 0 | 0 |
| 2-line | 14CSH294 | Zhuliangyou 4024   | 0 | 0 | 0 |
| 2-line | 14CSH48  | Zhuliangyou 538    | 0 | 0 | 0 |
| 2-line | 14CSH243 | Zhuliangyou 611    | 1 | 0 | 0 |
| 2-line | 14CSH370 | Zhuliangyou 729    | 1 | 0 | 0 |
| 2-line | 14CSH308 | Zhuliangyou 819    | 1 | 0 | 0 |
| 2-line | 14CSH346 | Zhuliangyou 90     | 1 | 0 | 0 |
| 2-line | 14CSH16  | Zhunliangyou 199   | 1 | 0 | 0 |
| 2-line | 14CSH148 | Zhunliangyou 608   | 1 | 0 | 0 |
| 2-line | 14CSH405 | Nliangyou 2#       | 1 | 1 | 1 |
| 2-line | 14CSH175 | Yliangyou 689      | 1 | 1 | 1 |
| 2-line | 14CSH172 | Guangliangyouai 93 | 1 | 1 | 1 |
| 2-line | 14CSH163 | Hualiangyou 1206   | 1 | 1 | 1 |
| 2-line | 14CSH245 | Huiliangyou 1813   | 1 | 1 | 1 |
| 2-line | 14CSH246 | Huiliangyou 6#     | 1 | 1 | 1 |
| 2-line | 14CSH189 | Liangyou 036       | 1 | 1 | 1 |
| 2-line | 14CSH160 | Liangyou 3905      | 1 | 1 | 1 |
| 2-line | 14CSH255 | Shenliangyou 3059  | 1 | 1 | 1 |
| 2-line | 14CSH325 | Shenliangyou 871   | 1 | 1 | 1 |
| 2-line | 14CSH39  | Shuangliangyou 1#  | 1 | 1 | 1 |
| 2-line | 14CSH177 | Tianliangyou 616   | 1 | 1 | 1 |
| 2-line | 14CSH227 | Wandao153 (2 Line) | 1 | 1 | 1 |
| 2-line | 14CSH401 | Xiangliangyou 2#   | 1 | 1 | 1 |
| 2-line | 14CSH176 | Yanliangyou 2208   | 1 | 1 | 1 |
| 2-line | 14CSH339 | Cliangyou 4488     | 1 | H | H |
| 2-line | 14CSH335 | Cliangyou 7#       | 1 | H | H |
| 2-line | 14CSH292 | Cliangyouhuazhan   | 1 | H | H |
| 2-line | 14CSH329 | Nliangyou 1#       | 1 | H | H |
| 2-line | 14CSH312 | Tliangyou 272      | 1 | H | H |

|               |          |                    |   |   |   |
|---------------|----------|--------------------|---|---|---|
| <b>2-line</b> | 14CSH382 | Yliangyou 143      | 1 | H | H |
| <b>2-line</b> | 14CSH4   | Yliangyou 16#      | 1 | H | H |
| <b>2-line</b> | 14CSH19  | Yliangyou 19       | 1 | H | H |
| <b>2-line</b> | 14CSH340 | Yliangyou 1998     | 1 | H | H |
| <b>2-line</b> | 14CSH201 | Yliangyou 1#       | 1 | H | H |
| <b>2-line</b> | 14CSH236 | Yliangyou 29       | 1 | H | H |
| <b>2-line</b> | 14CSH161 | Yliangyou 2#       | 1 | H | H |
| <b>2-line</b> | 14CSH411 | Yliangyou 302      | 1 | H | H |
| <b>2-line</b> | 14CSH285 | Yliangyou 3218     | 1 | H | H |
| <b>2-line</b> | 14CSH277 | Yliangyou 3399     | 1 | H | H |
| <b>2-line</b> | 14CSH233 | Yliangyou 372      | 1 | H | H |
| <b>2-line</b> | 14CSH49  | Yliangyou 5813     | 1 | H | H |
| <b>2-line</b> | 14CSH56  | Yliangyou 5967     | 1 | H | H |
| <b>2-line</b> | 14CSH30  | Yliangyou 599      | 1 | H | H |
| <b>2-line</b> | 14CSH338 | Yliangyou 6#       | 1 | H | H |
| <b>2-line</b> | 14CSH217 | Yliangyou 837      | 1 | H | H |
| <b>2-line</b> | 14CSH234 | Yliangyou 900      | 1 | H | H |
| <b>2-line</b> | 14CSH190 | Fengliangyou 1#    | 1 | H | H |
| <b>2-line</b> | 14CSH351 | Guang8you 199      | 1 | H | H |
| <b>2-line</b> | 14CSH256 | Guangliangyou 1128 | 1 | H | H |
| <b>2-line</b> | 14CSH55  | Heliangyou 114     | 1 | H | H |
| <b>2-line</b> | 14CSH311 | Hualiangyou 164    | 1 | H | H |
| <b>2-line</b> | 14CSH244 | Huilangyou 996     | 0 | 1 | H |
| <b>2-line</b> | 14CSH284 | Keliangyou 529     | 1 | H | H |
| <b>2-line</b> | 14CSH260 | Kiangyou 3219      | 1 | H | H |
| <b>2-line</b> | 14CSH28  | Liangyou 616       | 1 | H | H |
| <b>2-line</b> | 14CSH170 | Liangyou 6326      | 1 | H | H |
| <b>2-line</b> | 14CSH409 | Lingliangyou 102   | 0 | 1 | H |
| <b>2-line</b> | 14CSH248 | Lingliangyou 942   | 1 | H | H |
| <b>2-line</b> | 14CSH263 | Peiliangyou 981    | 1 | H | H |
| <b>2-line</b> | 14CSH254 | Shenliangyou 1#    | 1 | H | H |
| <b>2-line</b> | 14CSH307 | Shenliangyou 5814  | 1 | H | H |
| <b>2-line</b> | 14CSH224 | Shenliangyou 829   | 1 | H | H |
| <b>2-line</b> | 14CSH58  | Shenliangyou 862   | 1 | H | H |
| <b>2-line</b> | 14CSH57  | Shenliangyou 865   | 1 | H | H |
| <b>2-line</b> | 14CSH326 | Tanliangyou 921    | 1 | H | H |
| <b>2-line</b> | 14CSH331 | Wangliangyou 5511  | 1 | H | H |
| <b>2-line</b> | 14CSH169 | Xiangliangyou 396  | 1 | H | H |
| <b>2-line</b> | 14CSH5   | Xinliangyou 223    | 1 | H | H |
| <b>2-line</b> | 14CSH168 | Xinliangyou 6#     | 1 | H | H |
| <b>2-line</b> | 14CSH297 | Yangliangyou 6#    | 1 | H | H |
| <b>2-line</b> | 14CSH250 | Zhongliangyou 189  | 1 | H | H |
| <b>2-line</b> | 14CSH305 | Zhuliangyou 02     | 1 | H | H |
| <b>2-line</b> | 14CSH242 | Zhuliangyou 168    | 1 | H | H |

|               |          |                   |   |   |   |
|---------------|----------|-------------------|---|---|---|
| <b>2-line</b> | 14CSH47  | Zhuliangyou 6108  | 1 | H | H |
| <b>2-line</b> | 14CSH251 | Zhunliangyou 1141 | 0 | 1 | H |
| <b>3-line</b> | 14CSH270 | 1you 899          | 0 | 0 | 0 |
| <b>3-line</b> | 14CSH133 | II you 162        | 0 | 0 | 0 |
| <b>3-line</b> | 14CSH65  | II you 1733       | 0 | 0 | 0 |
| <b>3-line</b> | 14CSH24  | II you 183        | 0 | 0 | 0 |
| <b>3-line</b> | 14CSH273 | II you 28         | 0 | 0 | 0 |
| <b>3-line</b> | 14CSH134 | II you 310        | 0 | 0 | 0 |
| <b>3-line</b> | 14CSH333 | II you 372        | 0 | ? | 0 |
| <b>3-line</b> | 14CSH88  | II you 549        | 0 | 0 | 0 |
| <b>3-line</b> | 14CSH272 | II you 598        | 0 | 0 | 0 |
| <b>3-line</b> | 14CSH193 | II you 602        | 0 | 0 | 0 |
| <b>3-line</b> | 14CSH95  | II you 6078       | 0 | ? | 0 |
| <b>3-line</b> | 14CSH125 | II you 629        | 0 | ? | 0 |
| <b>3-line</b> | 14CSH25  | II you 673        | 0 | 0 | 0 |
| <b>3-line</b> | 14CSH92  | II you 838        | 0 | 0 | 0 |
| <b>3-line</b> | 14CSH38  | II you 936        | 0 | 0 | 0 |
| <b>3-line</b> | 14CSH271 | II youH 505       | 0 | 0 | 0 |
| <b>3-line</b> | 14CSH42  | II youhang 2#     | 0 | 0 | 0 |
| <b>3-line</b> | 14CSH76  | B6you 4761        | 0 | ? | 0 |
| <b>3-line</b> | 14CSH121 | Byou 827          | 1 | 0 | 0 |
| <b>3-line</b> | 14CSH131 | Dyou 20           | 0 | 0 | 0 |
| <b>3-line</b> | 14CSH257 | Fyou 498          | 1 | 0 | 0 |
| <b>3-line</b> | 14CSH102 | Fyou 993          | 1 | 0 | 0 |
| <b>3-line</b> | 14CSH204 | Gyou 217          | 1 | 0 | 0 |
| <b>3-line</b> | 14CSH293 | H37you 207        | 1 | 0 | 0 |
| <b>3-line</b> | 14CSH322 | Hyou 159          | 1 | 0 | 0 |
| <b>3-line</b> | 14CSH13  | Hyou 518          | 1 | 0 | 0 |
| <b>3-line</b> | 14CSH207 | Kyou 40           | 1 | 0 | 0 |
| <b>3-line</b> | 14CSH226 | Kyou 88           | 0 | 0 | 0 |
| <b>3-line</b> | 14CSH109 | Nyou 69           | 0 | 0 | 0 |
| <b>3-line</b> | 14CSH192 | Q you 5#          | 0 | 0 | 0 |
| <b>3-line</b> | 14CSH188 | Q2 you 3#         | 0 | ? | 0 |
| <b>3-line</b> | 14CSH194 | Qxiang 101        | 1 | 0 | 0 |
| <b>3-line</b> | 14CSH87  | Qyou 108          | 0 | 0 | 0 |
| <b>3-line</b> | 14CSH198 | Qyou 18           | 0 | 0 | 0 |
| <b>3-line</b> | 14CSH221 | Qyou 1#           | 0 | 0 | 0 |
| <b>3-line</b> | 14CSH225 | Qyou 4108         | 0 | 0 | 0 |
| <b>3-line</b> | 14CSH223 | Qyou 6#           | 0 | 0 | 0 |
| <b>3-line</b> | 14CSH222 | Tyou 111          | 0 | 0 | 0 |
| <b>3-line</b> | 14CSH393 | Tyou 15           | 0 | 0 | 0 |
| <b>3-line</b> | 14CSH295 | Tyou 180          | 0 | 0 | 0 |
| <b>3-line</b> | 14CSH63  | Tyou 463          | 0 | 0 | 0 |
| <b>3-line</b> | 14CSH321 | Tyou 535          | 0 | 0 | 0 |
| <b>3-line</b> | 14CSH318 | TyouH 505         | 0 | 0 | 0 |

|               |          |                    |   |   |   |
|---------------|----------|--------------------|---|---|---|
| <b>3-line</b> | 14CSH212 | Changyou 10#       | 0 | 0 | 0 |
| <b>3-line</b> | 14CSH33  | Changyou 964       | 0 | 0 | 0 |
| <b>3-line</b> | 14CSH200 | Chuanfeng 6#       | 0 | 0 | 0 |
| <b>3-line</b> | 14CSH107 | Chuanjiangyou 527  | 0 | ? | 0 |
| <b>3-line</b> | 14CSH123 | Chuannong2you 498  | 1 | 0 | 0 |
| <b>3-line</b> | 14CSH94  | Chuannongyou 527   | 1 | 0 | 0 |
| <b>3-line</b> | 14CSH184 | Chuannongyou 528   | 0 | 0 | 0 |
| <b>3-line</b> | 14CSH15  | Chuanxiangyou 1101 | 1 | 0 | 0 |
| <b>3-line</b> | 14CSH239 | Chuanxiangyou 506  | 0 | 0 | 0 |
| <b>3-line</b> | 14CSH44  | Chuanyou 673       | 1 | 0 | 0 |
| <b>3-line</b> | 14CSH363 | Dexiang 4103       | 1 | 0 | 0 |
| <b>3-line</b> | 14CSH82  | Deyou 4727         | 1 | 0 | 0 |
| <b>3-line</b> | 14CSH431 | Fengyou 191        | 1 | 0 | 0 |
| <b>3-line</b> | 14CSH105 | Fengyou 22         | 0 | ? | 0 |
| <b>3-line</b> | 14CSH360 | Fengyou 2#         | 0 | 0 | 0 |
| <b>3-line</b> | 14CSH423 | Fengyou 9#         | 0 | ? | 0 |
| <b>3-line</b> | 14CSH104 | Fengyouxiangzhan   | 0 | 0 | 0 |
| <b>3-line</b> | 14CSH429 | Fengyuanyou 299    | 0 | 0 | 0 |
| <b>3-line</b> | 14CSH110 | Fuyou 8217         | 0 | 0 | 0 |
| <b>3-line</b> | 14CSH191 | Gangyou 188        | 1 | 0 | 0 |
| <b>3-line</b> | 14CSH75  | Gangyou 22         | 0 | 0 | 0 |
| <b>3-line</b> | 14CSH101 | Gangyou 301        | 1 | 0 | 0 |
| <b>3-line</b> | 14CSH209 | Gangyou 36         | 0 | 0 | 0 |
| <b>3-line</b> | 14CSH132 | Gangyou 364        | 1 | 0 | 0 |
| <b>3-line</b> | 14CSH197 | Gangyou 48         | 1 | 0 | 0 |
| <b>3-line</b> | 14CSH208 | Gangyou 527        | 1 | 0 | 0 |
| <b>3-line</b> | 14CSH182 | Gangyou 618        | 1 | 0 | 0 |
| <b>3-line</b> | 14CSH91  | Gangyou 725        | 1 | 0 | 0 |
| <b>3-line</b> | 14CSH185 | Gangyou 88         | 1 | 0 | 0 |
| <b>3-line</b> | 14CSH211 | Gangyou 881        | 1 | 0 | 0 |
| <b>3-line</b> | 14CSH206 | Gangyou 900        | 1 | 0 | 0 |
| <b>3-line</b> | 14CSH195 | Gangyou 94-11      | 1 | 0 | 0 |
| <b>3-line</b> | 14CSH117 | Guofeng 1 #        | 0 | 0 | 0 |
| <b>3-line</b> | 14CSH315 | Heyou 1#           | 0 | 0 | 0 |
| <b>3-line</b> | 14CSH268 | Hongliangyou 166   | 0 | 0 | 0 |
| <b>3-line</b> | 14CSH180 | Hongyou 2009       | 1 | 0 | 0 |
| <b>3-line</b> | 14CSH60  | Huyou 196          | 0 | 0 | 0 |
| <b>3-line</b> | 14CSH203 | Huaxiang 4016      | 1 | 0 | 0 |
| <b>3-line</b> | 14CSH381 | Jianyou 8#         | 0 | 0 | 0 |
| <b>3-line</b> | 14CSH337 | Jiefengyou 1#      | 0 | 0 | 0 |
| <b>3-line</b> | 14CSH29  | Jinnong2you 3#     | 1 | 0 | 0 |
| <b>3-line</b> | 14CSH390 | Jinyou 117         | 0 | 0 | 0 |
| <b>3-line</b> | 14CSH36  | Jinyou 1398        | 0 | 0 | 0 |
| <b>3-line</b> | 14CSH332 | Jinyou 212         | 0 | ? | 0 |
| <b>3-line</b> | 14CSH334 | Jinyou 268         | 0 | 0 | 0 |

|               |          |                                    |   |   |   |
|---------------|----------|------------------------------------|---|---|---|
| <b>3-line</b> | 14CSH249 | Jinyou 402                         | 0 | ? | 0 |
| <b>3-line</b> | 14CSH323 | Jinyou 433                         | 0 | 0 | 0 |
| <b>3-line</b> | 14CSH320 | Jinyou 463                         | 0 | 0 | 0 |
| <b>3-line</b> | 14CSH353 | Jinyou 59                          | 0 | ? | 0 |
| <b>3-line</b> | 14CSH103 | Jinyougui 99                       | 0 | 0 | 0 |
| <b>3-line</b> | 14CSH397 | Jinyouhuai 340                     | 0 | 0 | 0 |
| <b>3-line</b> | 14CSH280 | Kexiangyou 56                      | 0 | 0 | 0 |
| <b>3-line</b> | 14CSH279 | Keyou 21                           | 0 | 0 | 0 |
| <b>3-line</b> | 14CSH216 | Liangxiang 1#(Neixiang6you<br>498) | 1 | 0 | 0 |
| <b>3-line</b> | 14CSH420 | Longxiangyou 3117                  | 0 | 0 | 0 |
| <b>3-line</b> | 14CSH428 | Longxiangyou 3208                  | 1 | 0 | 0 |
| <b>3-line</b> | 14CSH426 | Longxiangyou 7#                    | 0 | 0 | 0 |
| <b>3-line</b> | 14CSH85  | Luyou 578                          | 1 | 0 | 0 |
| <b>3-line</b> | 14CSH357 | Luyou 9803                         | 0 | 0 | 0 |
| <b>3-line</b> | 14CSH90  | Mianyou 725                        | 0 | 0 | 0 |
| <b>3-line</b> | 14CSH218 | Nei2you 111                        | 1 | 0 | 0 |
| <b>3-line</b> | 14CSH408 | Nei5you 263                        | 1 | 0 | 0 |
| <b>3-line</b> | 14CSH124 | Nei5you 39                         | 1 | 0 | 0 |
| <b>3-line</b> | 14CSH213 | Nei5youH 25                        | 1 | 0 | 0 |
| <b>3-line</b> | 14CSH362 | Nei5youyuxiang 1#                  | 1 | 0 | 0 |
| <b>3-line</b> | 14CSH274 | Neiwuyou 8105                      | 1 | 0 | 0 |
| <b>3-line</b> | 14CSH219 | Neixiang 8518                      | 1 | 0 | 0 |
| <b>3-line</b> | 14CSH119 | Neixiangyou 9#                     | 1 | 0 | 0 |
| <b>3-line</b> | 14CSH210 | Neixiangyou 1#                     | 1 | 0 | 0 |
| <b>3-line</b> | 14CSH289 | Nongxiangyou 204                   | 1 | 0 | 0 |
| <b>3-line</b> | 14CSH253 | Qianyou 1#                         | 0 | 0 | 0 |
| <b>3-line</b> | 14CSH64  | Rongyou 1506                       | 0 | 0 | 0 |
| <b>3-line</b> | 14CSH70  | Rongyou 225                        | 0 | ? | 0 |
| <b>3-line</b> | 14CSH359 | Rongyou 390                        | 0 | 0 | 0 |
| <b>3-line</b> | 14CSH67  | Rongyou 608                        | 0 | 0 | 0 |
| <b>3-line</b> | 14CSH97  | Rong18you 662                      | 1 | 0 | 0 |
| <b>3-line</b> | 14CSH214 | Rongyou 357                        | 0 | 0 | 0 |
| <b>3-line</b> | 14CSH35  | Shanyou 016                        | 0 | 0 | 0 |
| <b>3-line</b> | 14CSH78  | Shanyou 63                         | 0 | 0 | 0 |
| <b>3-line</b> | 14CSH62  | Shanyou 736                        | 0 | 0 | 0 |
| <b>3-line</b> | 14CSH51  | Shanyou 963                        | 0 | 0 | 0 |
| <b>3-line</b> | 14CSH317 | Shangyou 518                       | 1 | 0 | 0 |
| <b>3-line</b> | 14CSH2   | Shenyou 957                        | 0 | 0 | 0 |
| <b>3-line</b> | 14CSH27  | Shenyou 9775                       | 0 | 0 | 0 |
| <b>3-line</b> | 14CSH377 | Shengtaiyou 018                    | 1 | 0 | 0 |
| <b>3-line</b> | 14CSH376 | Shengtaiyou 722                    | 1 | 0 | 0 |
| <b>3-line</b> | 14CSH269 | Shengyou 99-98                     | 1 | 0 | 0 |
| <b>3-line</b> | 14CSH345 | Shuofeng 2#                        | 1 | 0 | 0 |
| <b>3-line</b> | 14CSH354 | Taiyou 390                         | 0 | 0 | 0 |

|               |          |                  |   |   |   |
|---------------|----------|------------------|---|---|---|
| <b>3-line</b> | 14CSH74  | Tengyou 527      | 1 | 0 | 0 |
| <b>3-line</b> | 14CSH68  | Tianfengyou 101  | 0 | 0 | 0 |
| <b>3-line</b> | 14CSH52  | Tianfengyou 6418 | 0 | 0 | 0 |
| <b>3-line</b> | 14CSH50  | Tianfengyou T025 | 0 | ? | 0 |
| <b>3-line</b> | 14CSH199 | Tianlongyou 827  | 1 | 0 | 0 |
| <b>3-line</b> | 14CSH352 | Tianyou 122      | 0 | 0 | 0 |
| <b>3-line</b> | 14CSH361 | Tianyou 2168     | 0 | 0 | 0 |
| <b>3-line</b> | 14CSH365 | Tianyou 290      | 0 | ? | 0 |
| <b>3-line</b> | 14CSH41  | Tianyou 673      | 0 | 0 | 0 |
| <b>3-line</b> | 14CSH240 | Tianyou 8012     | 0 | 0 | 0 |
| <b>3-line</b> | 14CSH366 | Tianyou 998      | 0 | 0 | 0 |
| <b>3-line</b> | 14CSH281 | Tianyouxiang 99  | 0 | 0 | 0 |
| <b>3-line</b> | 14CSH265 | Weiyu 46         | 0 | 0 | 0 |
| <b>3-line</b> | 14CSH264 | Weiyu 462        | 0 | 0 | 0 |
| <b>3-line</b> | 14CSH266 | Weiyu 535        | 0 | 0 | 0 |
| <b>3-line</b> | 14CSH3   | Weiyu 644        | 0 | 0 | 0 |
| <b>3-line</b> | 14CSH275 | Weiyu 8#         | 0 | ? | 0 |
| <b>3-line</b> | 14CSH136 | Wenfu 7#         | 1 | 0 | 0 |
| <b>3-line</b> | 14CSH328 | Wufengyou 569    | 0 | 0 | 0 |
| <b>3-line</b> | 14CSH53  | Wuyou 156        | 0 | 0 | 0 |
| <b>3-line</b> | 14CSH355 | Wuyou 369        | 0 | ? | 0 |
| <b>3-line</b> | 14CSH368 | Wuyou 613        | 0 | ? | 0 |
| <b>3-line</b> | 14CSH205 | Xiyu 17          | 0 | 0 | 0 |
| <b>3-line</b> | 14CSH278 | Xiangfeiyu 8118  | 0 | 0 | 0 |
| <b>3-line</b> | 14CSH309 | Xiangfengyou 9#  | 0 | 0 | 0 |
| <b>3-line</b> | 14CSH298 | Xiangyou 616     | 0 | 0 | 0 |
| <b>3-line</b> | 14CSH11  | Xiangyou 66      | 0 | 0 | 0 |
| <b>3-line</b> | 14CSH276 | Xiangyou 66      | 0 | 0 | 0 |
| <b>3-line</b> | 14CSH252 | Xieyou 1429      | 1 | 0 | 0 |
| <b>3-line</b> | 14CSH367 | Xieyou 716       | 0 | 0 | 0 |
| <b>3-line</b> | 14CSH415 | Xinxiangyou 111  | 0 | 0 | 0 |
| <b>3-line</b> | 14CSH374 | Xinyou 9113      | 1 | 0 | 0 |
| <b>3-line</b> | 14CSH142 | Yixiang 1979     | 1 | 0 | 0 |
| <b>3-line</b> | 14CSH137 | Yixiang 481      | 1 | 0 | 0 |
| <b>3-line</b> | 14CSH143 | Yixiang 725      | 1 | 0 | 0 |
| <b>3-line</b> | 14CSH215 | Yixiangyou 2115  | 1 | 0 | 0 |
| <b>3-line</b> | 14CSH81  | Yiyu 2815        | 1 | 0 | 0 |
| <b>3-line</b> | 14CSH86  | Yiyu 591         | 1 | 0 | 0 |
| <b>3-line</b> | 14CSH34  | Yiyu 673         | 1 | 0 | 0 |
| <b>3-line</b> | 14CSH54  | YouI 2009        | 0 | 0 | 0 |
| <b>3-line</b> | 14CSH66  | YouI 608         | 0 | 0 | 0 |
| <b>3-line</b> | 14CSH69  | YouI 651         | 0 | 0 | 0 |
| <b>3-line</b> | 14CSH202 | Yuyou 528        | 1 | 0 | 0 |
| <b>3-line</b> | 14CSH111 | Yuyou 7109       | 0 | 0 | 0 |
| <b>3-line</b> | 14CSH120 | Yuyou 388        | 1 | 0 | 0 |

|               |          |                       |   |   |   |
|---------------|----------|-----------------------|---|---|---|
| <b>3-line</b> | 14CSH130 | Yuanyou 409           | 0 | ? | 0 |
| <b>3-line</b> | 14CSH375 | Yueyou 360            | 1 | 0 | 0 |
| <b>3-line</b> | 14CSH387 | Yueyou 518            | 1 | 0 | 0 |
| <b>3-line</b> | 14CSH384 | Zhongyou 117          | 0 | 0 | 0 |
| <b>3-line</b> | 14CSH108 | Zhongyou 18           | 1 | 0 | 0 |
| <b>3-line</b> | 14CSH187 | Zhongyou 6761         | 1 | 0 | 0 |
| <b>3-line</b> | 14CSH407 | Zhongyou 9806         | 0 | 0 | 0 |
| <b>3-line</b> | 14CSH181 | Zhongfeng 2# (3 line) | 0 | 0 | 0 |
| <b>3-line</b> | 14CSH71  | Kyou 451              | 1 | 1 | 1 |
| <b>3-line</b> | 14CSH22  | Jiayou 5#             | 1 | 1 | 1 |
| <b>3-line</b> | 14CSH59  | Jiangke 736           | 1 | 1 | 1 |
| <b>3-line</b> | 14CSH167 | Qiyou 1068            | 1 | 1 | 1 |
| <b>3-line</b> | 14CSH150 | Xieyou 80             | 1 | 1 | 1 |
| <b>3-line</b> | 14CSH149 | Yueyou 938            | 1 | 1 | 1 |
| <b>3-line</b> | 14CSH159 | Zheyu 18              | 1 | 1 | 1 |
| <b>3-line</b> | 14CSH267 | Dqibaoyou 1#          | 1 | H | H |
| <b>3-line</b> | 14CSH283 | Bingyou 3218          | 1 | H | H |
| <b>3-line</b> | 14CSH282 | Bingyou 3399          | 1 | H | H |
| <b>3-line</b> | 14CSH291 | Caiyouhuazhan         | 0 | 1 | H |
| <b>3-line</b> | 14CSH424 | Fengyouhuazhan        | 1 | H | H |
| <b>3-line</b> | 14CSH232 | Guyou 16              | 1 | H | H |
| <b>3-line</b> | 14CSH231 | Guyou 169             | 0 | 1 | H |
| <b>3-line</b> | 14CSH230 | Guyou 3139            | 1 | H | H |
| <b>3-line</b> | 14CSH228 | Guyou 3301            | 1 | H | H |
| <b>3-line</b> | 14CSH229 | Guyou 527             | 1 | H | H |
| <b>3-line</b> | 14CSH40  | Guyou 964             | 1 | H | H |
| <b>3-line</b> | 14CSH14  | Huaxiangyou 69        | 1 | H | H |
| <b>3-line</b> | 14CSH406 | Huayou 322            | 0 | 1 | H |
| <b>3-line</b> | 14CSH356 | Jinyou 163            | 0 | 1 | H |
| <b>3-line</b> | 14CSH310 | Jinyou 284            | 0 | 1 | H |
| <b>3-line</b> | 14CSH427 | Longxiangyouhuazhan   | 0 | 1 | H |
| <b>3-line</b> | 14CSH171 | Lvfeng 20             | 1 | H | H |
| <b>3-line</b> | 14CSH165 | Qianyou 930           | 0 | 1 | H |
| <b>3-line</b> | 14CSH364 | Qingyou 109           | 0 | 1 | H |
| <b>3-line</b> | 14CSH43  | Shanyou 70            | 0 | 1 | H |
| <b>3-line</b> | 14CSH430 | Shenyou 9520          | 0 | 1 | H |
| <b>3-line</b> | 14CSH122 | Shenyou 9734          | 0 | 1 | H |
| <b>3-line</b> | 14CSH378 | Shengtaiyou 9712      | 1 | H | H |
| <b>3-line</b> | 14CSH379 | Tanyuanyou 0845       | 1 | H | H |
| <b>3-line</b> | 14CSH37  | Teyou 009             | 1 | H | H |
| <b>3-line</b> | 14CSH237 | Teyou 107             | 1 | H | H |
| <b>3-line</b> | 14CSH31  | Teyou 175             | 1 | H | H |
| <b>3-line</b> | 14CSH26  | Teyouhang 2#          | 1 | H | H |
| <b>3-line</b> | 14CSH61  | Tianfengyou 316       | 0 | 1 | H |
| <b>3-line</b> | 14CSH304 | Tianyouhuazhan        | 0 | 1 | H |

|               |          |                   |   |   |   |
|---------------|----------|-------------------|---|---|---|
| <b>3-line</b> | 14CSH262 | Wuyouhuazhan      | 0 | 1 | H |
| <b>3-line</b> | 14CSH261 | Xinlongyou 1#     | 1 | H | H |
| <b>3-line</b> | 14CSH341 | Xingyou 1#        | 0 | 1 | H |
| <b>3-line</b> | 14CSH155 | Yongyou 15        | 0 | 1 | H |
| <b>3-line</b> | 14CSH327 | Yueyou 27         | 1 | H | H |
| <b>3-line</b> | 14CSH299 | Yueyou 712        | 1 | H | H |
| <b>3-line</b> | 14CSH373 | Yueyou 9264       | 1 | H | H |
| <b>3-line</b> | 14CSH300 | Zaofengyouhuazhan | 1 | H | H |
| <b>2-line</b> | 14CSH115 | Ejingza 1#        | 1 | 1 | 1 |
| <b>3-line</b> | 14CSH79  | Yunyou 948        | 1 | 0 | 0 |
| <b>3-line</b> | 14CSH147 | Chunyou 84        | 1 | 1 | 1 |
| <b>3-line</b> | 14CSH157 | Yongyou 12        | 1 | 1 | 1 |
| <b>3-line</b> | 14CSH173 | Yongyou 17        | 1 | 1 | 1 |
| <b>3-line</b> | 14CSH156 | Yongyou 538       | 1 | 1 | 1 |
| <b>3-line</b> | 14CSH158 | Yongyou 9#        | 1 | 1 | 1 |



**Table S5** Genotypes of *Ghd7* in 14 hybrid combinations

| Hybrids    | <u>M</u> aternal<br>parents | <u>P</u> aternal<br>parents | <i>Ghd7</i> |    | Two or three line<br>hybrid rice |
|------------|-----------------------------|-----------------------------|-------------|----|----------------------------------|
|            |                             |                             | M           | P  |                                  |
| Z1007      | Zi100A                      | RB207-1                     | -           | ++ | 3-line                           |
| YY1        | Y58S                        | 93-11                       | -           | ++ | 2-line                           |
| PA64S/JSD  | PA64S                       | Jusuidao                    | +           | ++ | 2-line                           |
| LY1128     | P88S                        | HR1128                      | -           | ++ | 2-line                           |
| YY2        | Y58S                        | Yuanhui2                    | -           | ++ | 2-line                           |
| II Y838    | II -32A                     | Fuhui838                    | -           | ++ | 3-line                           |
| FY299      | FengyuanA                   | Xianghui299                 | -           | ++ | 3-line                           |
| LYP9       | PA64S                       | 93-11                       | +           | ++ | 2-line                           |
| LY0293     | P88S                        | 0293                        | -           | ++ | 2-line                           |
| YTA/93-11  | YuetaiA                     | 93-11                       | +           | ++ | 3-line                           |
| V46        | V20A                        | Miyang46                    | -           | ++ | 3-line                           |
| SY63       | Zhenshan97A                 | Minghui63                   | -           | ++ | 3-line                           |
| JY207      | Jin23A                      | Xianhui207                  | -           | ++ | 3-line                           |
| PA64S/R527 | PA64S                       | Shuhui527                   | +           | ++ | 2-line                           |

++: functional allele similar to *Ghd7*<sup>93-11</sup>

+: weakly functional allele identical to *Ghd7*<sup>Nipponbare</sup>

-: nonfunctional allele

**Table S6.** List of primers used for PCR and sequencing

|                                          | <b>Forward primer</b>      | <b>Reverse primer</b>   | <b>Product size (bp)</b> |
|------------------------------------------|----------------------------|-------------------------|--------------------------|
| RH8cds                                   | GTCCTTATGTTTGCTTTGTGTCCG   | AATATATGTTTTCCCAATGTGCC | 1335                     |
| RH8Seq-1                                 | ACTCGCATCTCCTCACCTCCTTTC   | –                       | –                        |
| RH8Seq-2                                 | TATTTTTCTTCAATTTTAAACCATAC | –                       | –                        |
| RH8indel                                 | TCCGCATCGATACCGTCTTCCC     | TCAACCACCTCCGTTGCCTCCT  | 1440                     |
| RH8caps<br>(Digested with <i>TspR1</i> ) | CACCACTCCATCCTCAACTCCC     | TGTTTTCCCAATGTGCCAAGC   | 1240                     |

## Other Supporting Information Files

Dataset S1 ([XLSX](#))

Dataset S2 ([XLSX](#))

Dataset S3 ([XLSX](#))

Dataset S4 ([XLSX](#))

Dataset S5 ([XLSX](#))

**Dataset S1.** Phenotypic data for LYP9 and its parents for the years 2010-2015.

**Dataset S2.** QTL information on yield-related traits detected in the RIL and RILBC1 populations.

**Dataset S3.** Overview of the mRNA sequencing and mapping results.

Techniques and biological replicates are also included. All of the sequence reads from each sample were mapped onto the genome and junction sequences of *O. sativa japonica* (TIGR Ver 6.1), and only uniquely-mapped reads were used for further expression abundance quantification.

**Dataset S4.** Flowering-, circadian rhythm-, and panicle branching-related non-additively expressed genes.

**Dataset S5.** Enriched pathways of the DEGs that overlapped with QTL regions.
